# Supplementary material for: Sampling Statistical Errors in Big Data Research: 3 Cases of Breast Cancer Research
Source: bioRxiv or medRxiv preprint supplement (doi:10.1101/2021.10.07.21264601), 2021-11-01
Supplement: Supplementary file [file media-1.pdf]

# Sampling Statistical Errors in Big Data Research: 3 Cases of Breast Cancer Research

**Han-Jun Cho<sup>1</sup>, EuiSeok Jeong<sup>2</sup>**

1. Department of Biomedical Institute for Convergence at SKKU, Suwon, 16419, South
2. Department of Ecological Science, Kyungpook National University, Sangju 37224, South Korea

Table 1. Recurrence groups of Breast cancer patients from TCGA data set (N=652)

| Recurrence               | Patients (%) |
|--------------------------|--------------|
| Disease Free(R0)         | 589 (90.3%)  |
| Recurred/Progressed (R1) | 63 (9.7%)    |

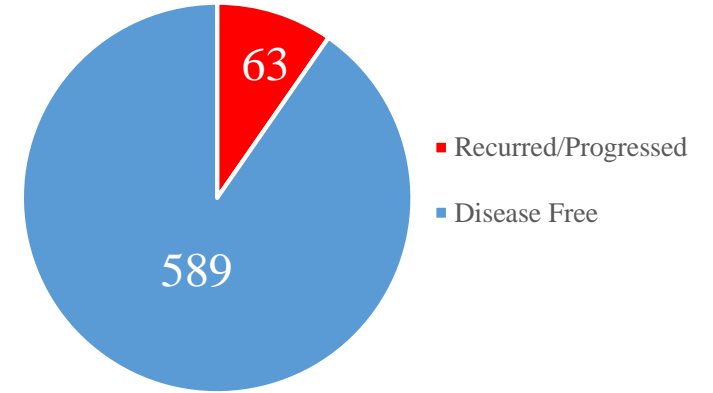

**Total of 40 recurrence-related genes were selected by ML, and of which 7 genes were identified as recurrence-specific. Each feature selection methods and performances of classifiers were useful according to disease free/recurred groups. Extremely useful genes were extracted.**

Table 2-1. Recurrence-specific 3 out of 40 common genes from top 100 genes, respectively selected by 4 feature selection methods.

| Gene     | Type | Recurrence group |    | Recurrence (%) | Mutation Number | Mutation/652 (%) | Mutation Type |                    |         | Fisher's exact (p-value) | cytoband |
|----------|------|------------------|----|----------------|-----------------|------------------|---------------|--------------------|---------|--------------------------|----------|
|          |      | R0               | R1 |                |                 |                  | Truncating    | Missense (unknown) | Inframe |                          |          |
| ACACA    |      | 3                | 0  | 0.00%          | 3               | 0.46%            | 1             | 2                  | 0       | 1                        | 17q12    |
| ACSF3    |      | 2                | 1  | 33.33%         | 3               | 0.46%            | 1             | 2                  | 0       | 0.263                    | 16q24.3  |
| ARID3B   |      | 1                | 1  | 50.00%         | 2               | 0.31%            | 0             | 2                  | 0       | 0.184                    | 15q24.1  |
| ATP5PB   |      | 1                | 0  | 0.00%          | 1               | 0.15%            | 0             | 1                  | 0       | 1                        | 1p13.2   |
| ADGRB2   |      | 3                | 0  | 0.00%          | 3               | 0.46%            | 1             | 1                  | 1       | 1                        | 1p35.2   |
| C11ORF24 |      | 2                | 0  | 0.00%          | 2               | 0.31%            | 0             | 2                  | 0       | 1                        | 11q13.2  |
| MAJIN    |      | 1                | 0  | 0.00%          | 1               | 0.15%            | 0             | 1                  | 0       | 1                        | 11q13.1  |
| CALCRL   |      | 1                | 0  | 0.00%          | 1               | 0.15%            | 0             | 1                  | 0       | 1                        | 2q32.1   |
| CELSR1   |      | 5                | 1  | 16.67%         | 6               | 0.92%            | 2             | 4                  | 0       | 0.458                    | 22q13.31 |
| CWC25    |      | 2                | 0  | 0.00%          | 2               | 0.31%            | 0             | 2                  | 0       | 1                        | 17q12    |
| DNMT3B   |      | 2                | 0  | 0.00%          | 2               | 0.31%            | 0             | 2                  | 0       | 1                        | 20q11.21 |
| ECM2     |      | 2                | 1  | 33.33%         | 3               | 0.46%            | 0             | 2                  | 1       | 0.263                    | 9q22.31  |
| EFCAB12  |      | 1                | 0  | 0.00%          | 1               | 0.15%            | 0             | 1                  | 0       | 1                        | 3q21.3   |
| ERO1A    |      | 1                | 0  | 0.00%          | 1               | 0.15%            | 0             | 1                  | 0       | 1                        | 14q22.1  |
| EYA3     |      | 2                | 0  | 0.00%          | 2               | 0.31%            | 0             | 2                  | 0       | 1                        | 1p35.3   |
| FRG1     |      | 5                | 1  | 16.67%         | 6               | 0.92%            | 2             | 4                  | 0       | 0.458                    | 4q35.2   |
| GUCY1B1  |      | 2                | 0  | 0.00%          | 2               | 0.31%            | 1             | 1                  | 0       | 1                        | 4q32.1   |
| HAVCR1   |      | 1                | 0  | 0.00%          | 1               | 0.15%            | 0             | 1                  | 0       | 1                        | 5q33.3   |
| HK3      |      | 1                | 1  | 50.00%         | 2               | 0.31%            | 0             | 2                  | 0       | 0.184                    | 5q35.2   |
| HTR1E    |      | 2                | 0  | 0.00%          | 2               | 0.31%            | 1             | 1                  | 0       | 1                        | 6q14.3   |

Table 2-2. Recurrence-specific 3 out of 40 common genes from top 100 genes, respectively selected by 4 feature selection methods.

| Gene          | Recurrence group |    | Recurrence (%) | Mutation Number | Mutation/652 (%) | Mutation Type |                    |         | Fisher's exact (p-value) | cytoband       |
|---------------|------------------|----|----------------|-----------------|------------------|---------------|--------------------|---------|--------------------------|----------------|
|               | R0               | R1 |                |                 |                  | Truncating    | Missense (unknown) | Inframe |                          |                |
| HYLS1         | 2                | 0  | 0.00%          | 2               | 0.31%            | 0             | 2                  | 0       | 1                        | 11q24.2        |
| KHDRBS2       | 1                | 0  | 0.00%          | 1               | 0.15%            | 0             | 1                  | 0       | 1                        | 6q11.1         |
| <b>KHSRP</b>  | 0                | 2  | 100.00%        | 2               | 0.31%            | 1             | 1                  | 0       | <b>0.009</b>             | 19p13.3        |
| LILRA5        | 1                | 0  | 0.00%          | 1               | 0.15%            | 0             | 1                  | 0       | 1                        | 19q13.42       |
| <b>LUZP2</b>  | 0                | 2  | 100.00%        | 2               | 0.31%            | 0             | 2                  | 0       | <b>0.009</b>             | 11p14.3        |
| MAP3K4        | 2                | 0  | 0.00%          | 2               | 0.31%            | 2             | 0                  | 0       | 1                        | 6q26           |
| NDFIP2        | 2                | 1  | 33.33%         | 3               | 0.46%            | 0             | 3                  | 0       | 0.263                    | 13q31.1        |
| PDZD8         | 1                | 1  | 50.00%         | 2               | 0.31%            | 0             | 2                  | 0       | 0.184                    | 10q25.3-q26.11 |
| PITX2         | 1                | 0  | 0.00%          | 1               | 0.15%            | 0             | 1                  | 0       | 1                        | 4q25           |
| <b>RPL18A</b> | 2                | 1  | 33.33%         | 3               | 0.46%            | 1             | 2                  | 0       | 0.263                    | 19p13.11       |
| SIAH1         | 2                | 0  | 0.00%          | 2               | 0.31%            | 1             | 1                  | 0       | 1                        | 16q12.1        |
| SLC15A1       | 1                | 0  | 0.00%          | 1               | 0.15%            | 0             | 1                  | 0       | 1                        | 13q32.2-q32.3  |
| SMCR8         | 2                | 0  | 0.00%          | 2               | 0.31%            | 0             | 2                  | 0       | 1                        | 17p11.2        |
| SYNPR         | 1                | 1  | 50.00%         | 2               | 0.31%            | 1             | 1                  | 0       | 0.184                    | 3p14.2         |
| <b>TPI1</b>   | 0                | 1  | 100.00%        | 1               | 0.15%            | 1             | 0                  | 0       | 0.097                    | 12p13.31       |
| TPPP2         | 2                | 0  | 0.00%          | 2               | 0.31%            | 0             | 2                  | 0       | 1                        | 14q11.2        |
| TTLL13P       | 1                | 0  | 0.00%          | 1               | 0.15%            | 0             | 1                  | 0       | 1                        | 15q26.1        |
| UBE3B         | 2                | 0  | 0.00%          | 2               | 0.31%            | 0             | 2                  | 0       | 1                        | 12q24.11       |
| <b>VWA5B2</b> | 1                | 2  | 66.67%         | 3               | 0.46%            | 1             | 2                  | 0       | <b>0.026</b>             | 3q27.1         |
| ZNF615        | 2                | 0  | 0.00%          | 2               | 0.31%            | 1             | 1                  | 0       | 1                        | 19q13.41       |

Table 3. Recurrence data of 7 Kaplan meier specific genes from 40 Recurrence-related genes.

| Gene \ Survival | Overall Survival (P-value) | Disease Free Survival (P-value) | note                                                                                                                                                           |
|-----------------|----------------------------|---------------------------------|----------------------------------------------------------------------------------------------------------------------------------------------------------------|
| ACSF3           | 0.00241                    | 0.094                           | <b>7 Genes /<br/>Total 40 Genes</b><br> : Specific Gene<br>(P-value < 0.05) |
| ARID3B          | 6.27E-05                   | 0.12                            |                                                                                                                                                                |
| KHSRP           | 0.269                      | 0.0001616                       |                                                                                                                                                                |
| LUZP2           | 4.82E-04                   | 0.00208                         |                                                                                                                                                                |
| RPL18A          | 4.61E-07                   | 0.0032                          |                                                                                                                                                                |
| TPI1            | 0                          | 2.49E-09                        |                                                                                                                                                                |
| VWA5B2          | 3.33E-05                   | 0.00179                         |                                                                                                                                                                |

Figure 1. Distribution of patients by medical institution type

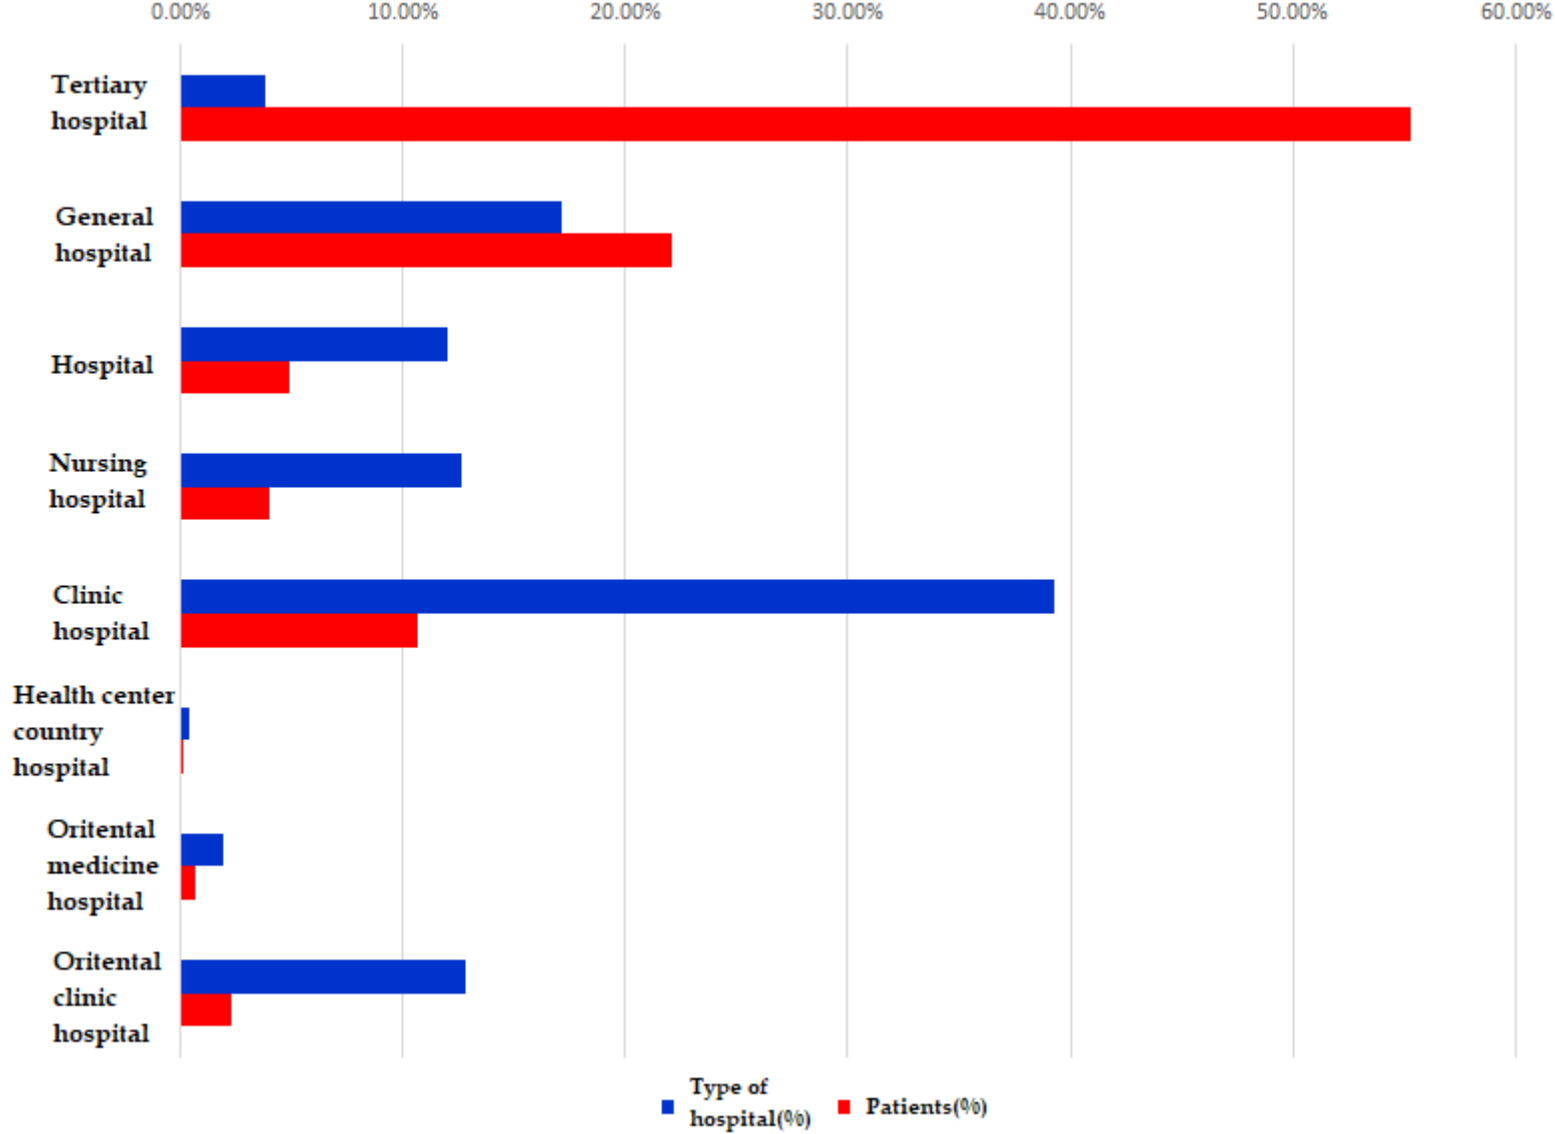

Figure 2. KM-Curve: ACSF3 survival specific mutation gene

ACSF3

Overall Survival Kaplan-Meier Estimate

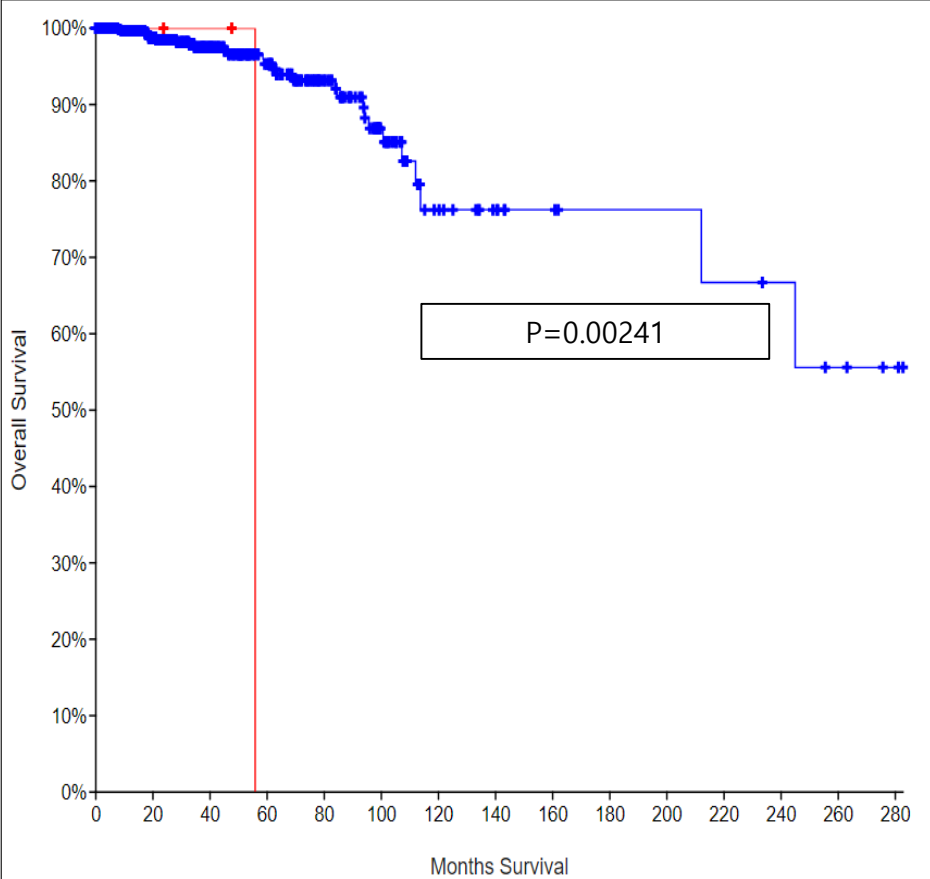

|                                              | Number of Cases, Total | Number of Cases, Deceased | Median Months Survival |
|----------------------------------------------|------------------------|---------------------------|------------------------|
| Cases with Alteration(s) in Query Gene(s)    | 3                      | 1                         | 55.81                  |
| Cases without Alteration(s) in Query Gene(s) | 649                    | 28                        | NA                     |

Figure 3. KM-Curve: ARID3B survival specific mutation gene

ARID3B

Overall Survival Kaplan-Meier Estimate

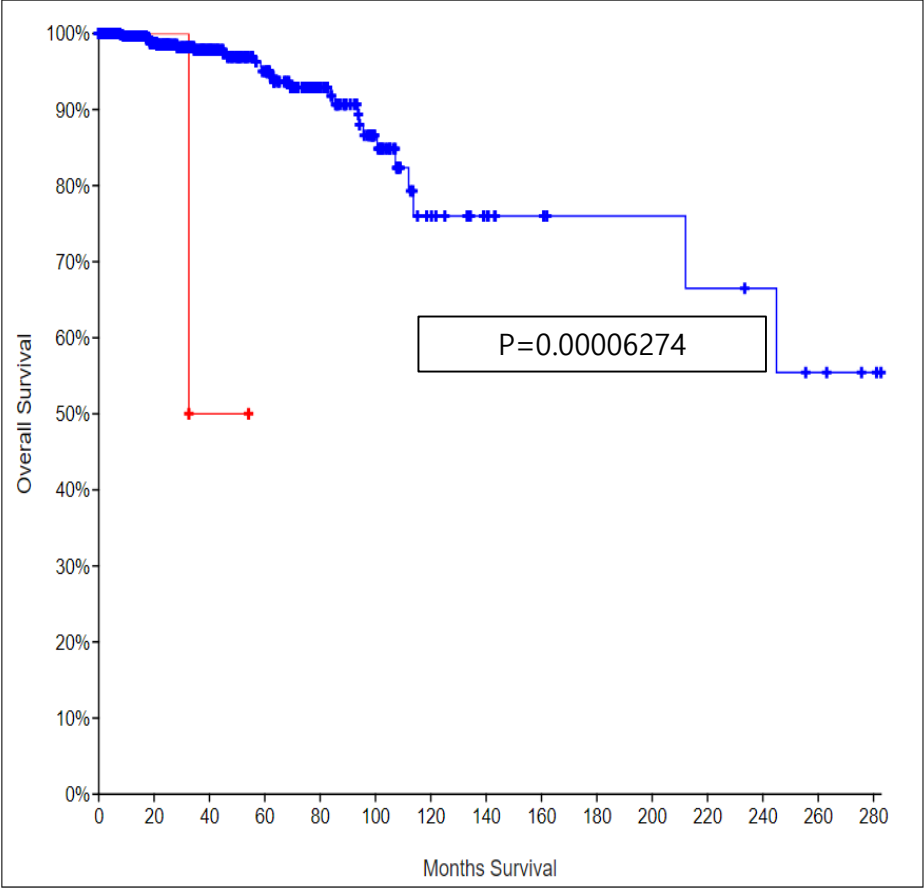

|                                              | Number of Cases, Total | Number of Cases, Deceased | Median Months Survival |
|----------------------------------------------|------------------------|---------------------------|------------------------|
| Cases with Alteration(s) in Query Gene(s)    | 2                      | 1                         | 32.56                  |
| Cases without Alteration(s) in Query Gene(s) | 650                    | 28                        | NA                     |



Figure 4. KM-Curve: KHSRP survival specific mutation gene

KHSRP

Disease/Progression-free Kaplan-Meier Estimate

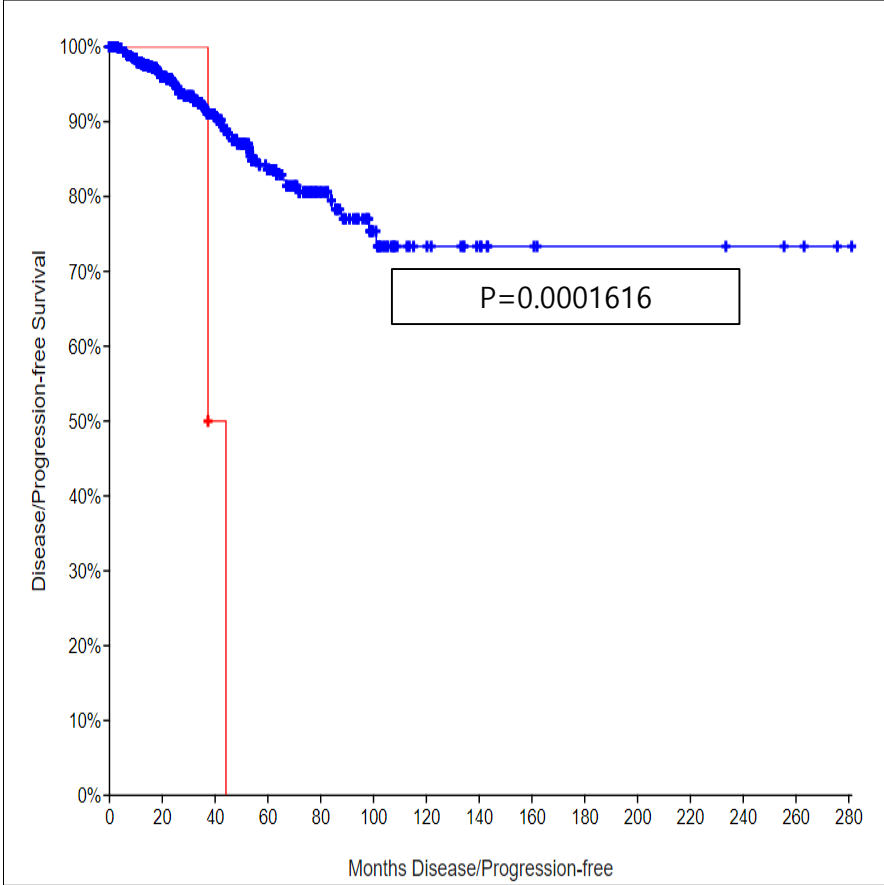

|                                              | Number of Cases, Total | Number of Cases, Relapsed/Progressed | Median Months Disease-free |
|----------------------------------------------|------------------------|--------------------------------------|----------------------------|
| Cases with Alteration(s) in Query Gene(s)    | 2                      | 2                                    | 37.32                      |
| Cases without Alteration(s) in Query Gene(s) | 650                    | 61                                   | NA                         |

Figure 5. **KM-Curve: LUZP2 survival specific mutation gene**

**LUZP2**

A Overall Survival Kaplan-Meier Estimate

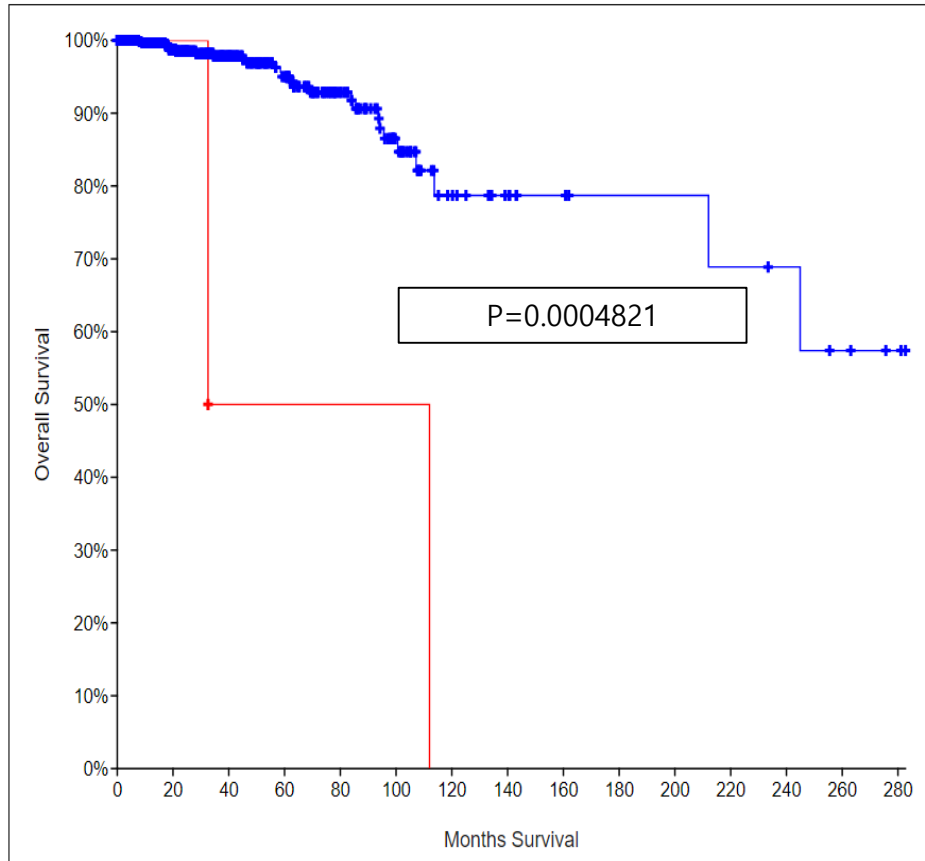

B Disease/Progression-free Kaplan-Meier Estimate

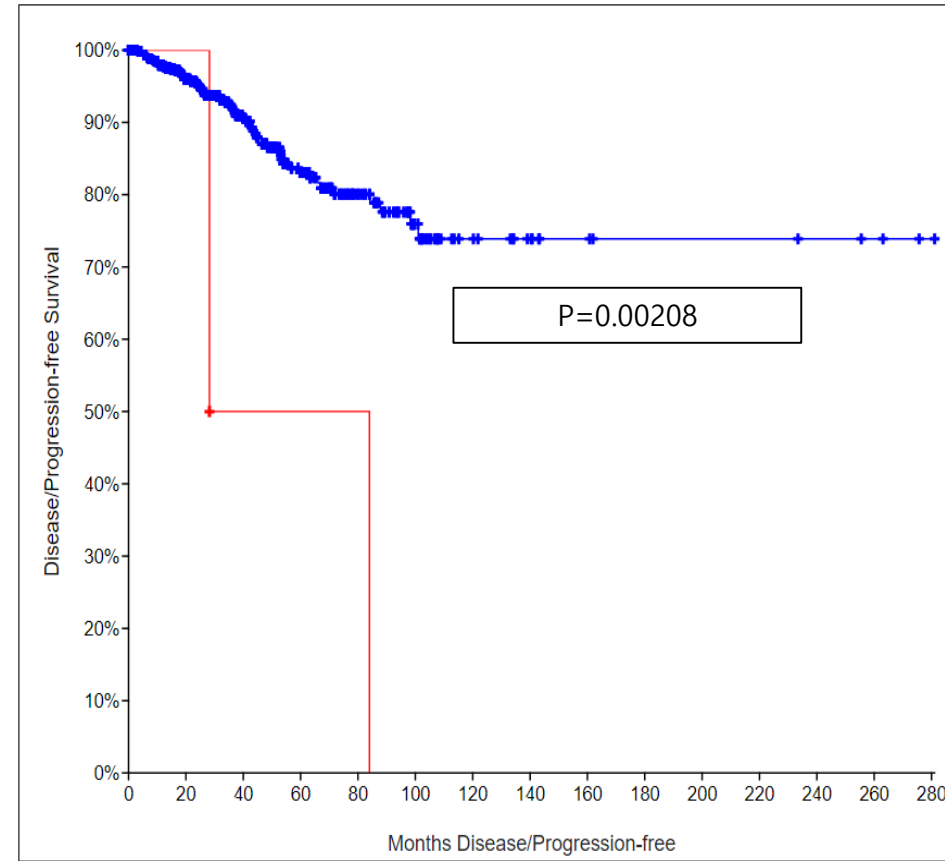

|                                              | Number of Cases, Total | Number of Cases, Deceased | Median Months Survival |
|----------------------------------------------|------------------------|---------------------------|------------------------|
| Cases with Alteration(s) in Query Gene(s)    | 2                      | 2                         | 32.56                  |
| Cases without Alteration(s) in Query Gene(s) | 650                    | 27                        | NA                     |

|                                              | Number of Cases, Total | Number of Cases, Relapsed/Progressed | Median Months Disease-free |
|----------------------------------------------|------------------------|--------------------------------------|----------------------------|
| Cases with Alteration(s) in Query Gene(s)    | 2                      | 2                                    | 28.22                      |
| Cases without Alteration(s) in Query Gene(s) | 650                    | 61                                   | NA                         |

**Figure 6. KM-Curve: RPL18A survival specific mutation gene**

**RPL18A**

**A Overall Survival Kaplan-Meier Estimate**

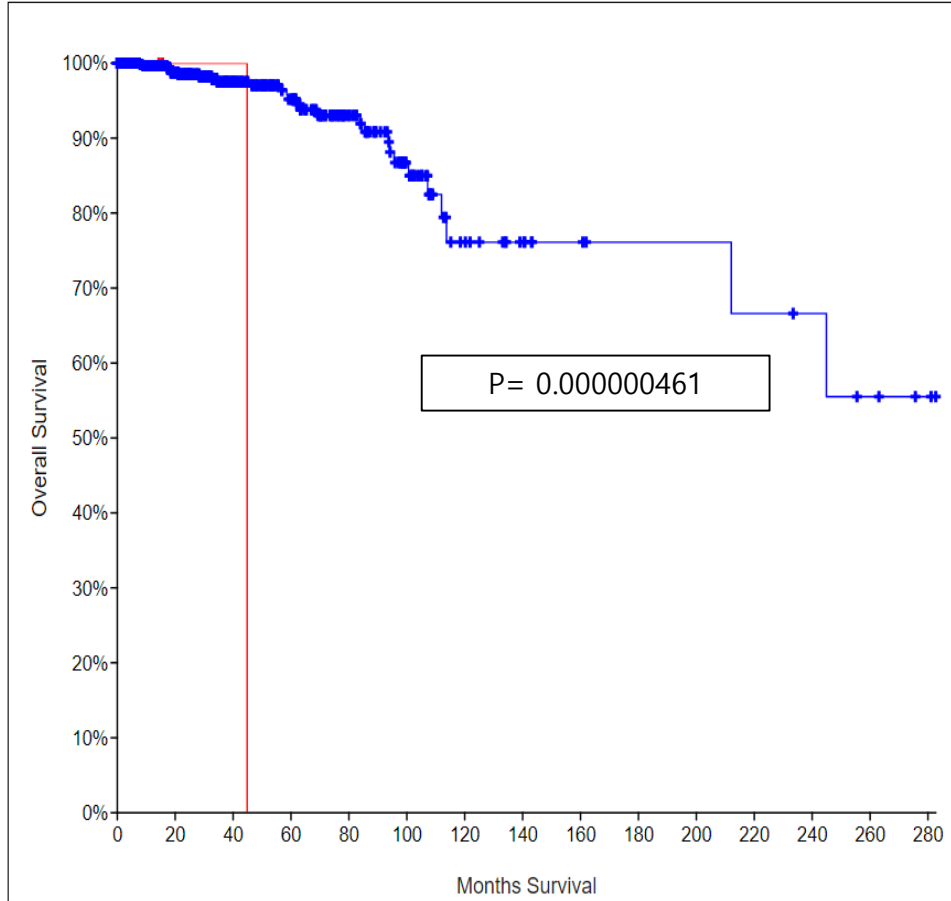

|                                              | Number of Cases, Total | Number of Cases, Deceased | Median Months Survival |
|----------------------------------------------|------------------------|---------------------------|------------------------|
| Cases with Alteration(s) in Query Gene(s)    | 3                      | 1                         | 44.84                  |
| Cases without Alteration(s) in Query Gene(s) | 649                    | 28                        | NA                     |

**B Disease/Progression-free Kaplan-Meier Estimate**

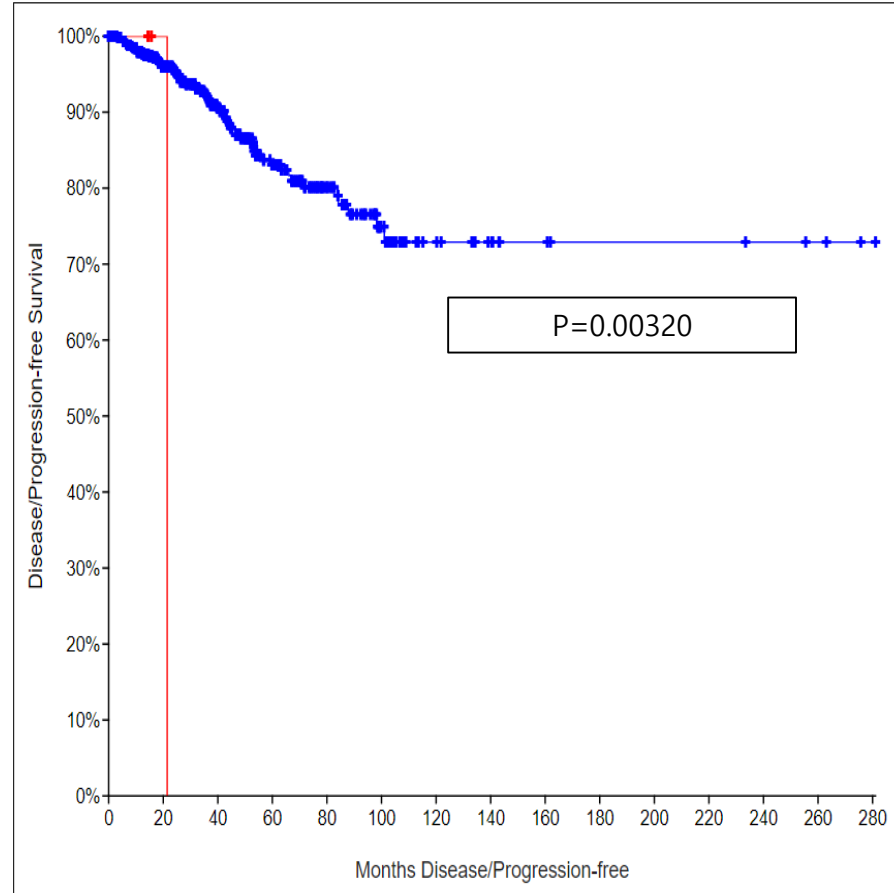

|                                              | Number of Cases, Total | Number of Cases, Relapsed/Progressed | Median Months Disease-free |
|----------------------------------------------|------------------------|--------------------------------------|----------------------------|
| Cases with Alteration(s) in Query Gene(s)    | 3                      | 1                                    | 21.45                      |
| Cases without Alteration(s) in Query Gene(s) | 649                    | 62                                   | NA                         |

Figure 7. **KM-Curve: TPI1 survival specific mutation gene**

**TPI1**

A Overall Survival Kaplan-Meier Estimate

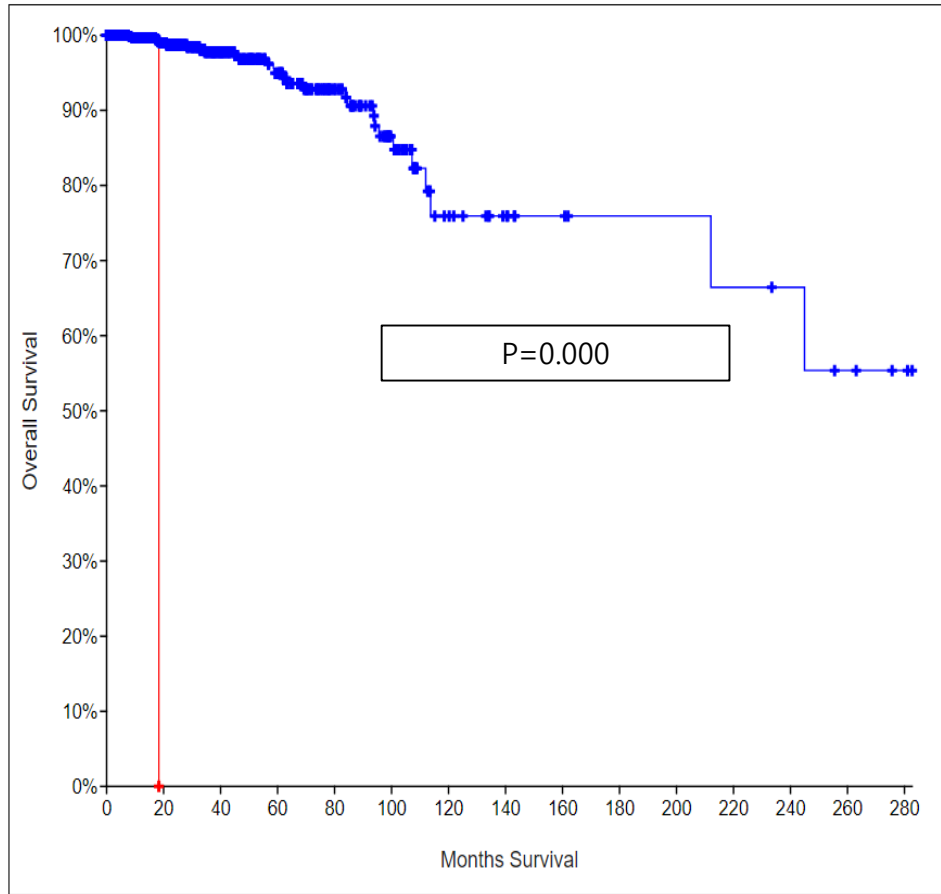

|                                              | Number of Cases, Total | Number of Cases, Deceased | Median Months Survival |
|----------------------------------------------|------------------------|---------------------------|------------------------|
| Cases with Alteration(s) in Query Gene(s)    | 1                      | 1                         | 18.33                  |
| Cases without Alteration(s) in Query Gene(s) | 651                    | 28                        | NA                     |

B Disease/Progression-free Kaplan-Meier Estimate

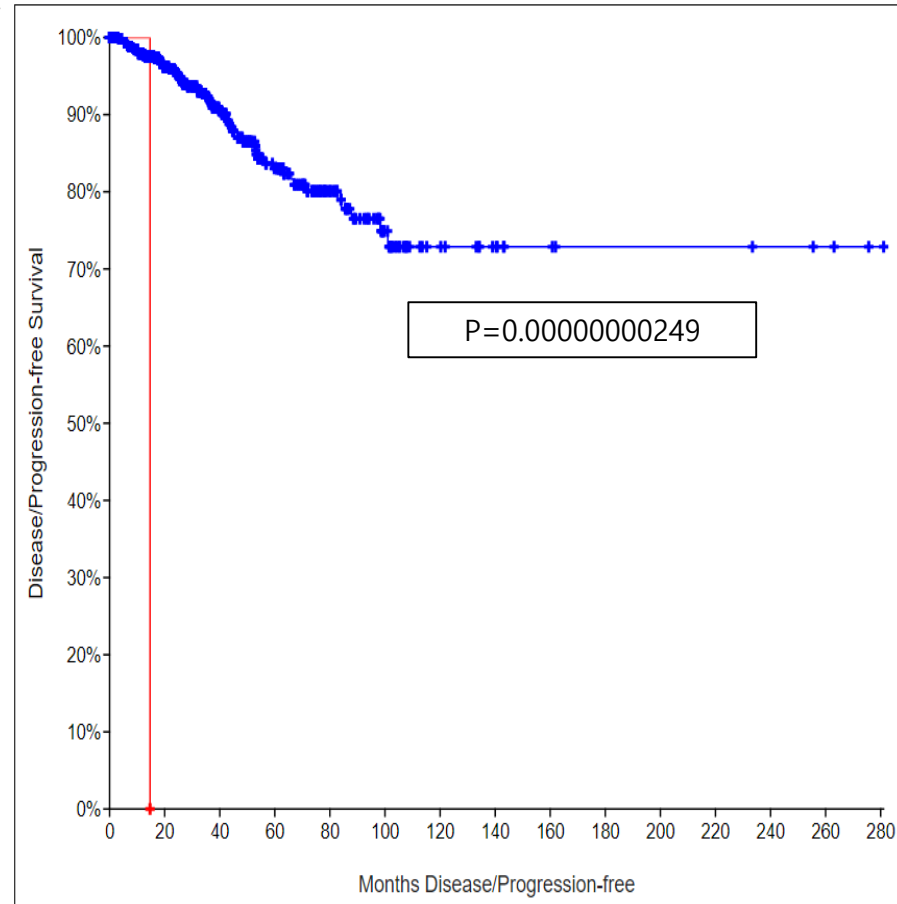

|                                              | Number of Cases, Total | Number of Cases, Relapsed/Progressed | Median Months Disease-free |
|----------------------------------------------|------------------------|--------------------------------------|----------------------------|
| Cases with Alteration(s) in Query Gene(s)    | 1                      | 1                                    | 14.68                      |
| Cases without Alteration(s) in Query Gene(s) | 651                    | 62                                   | NA                         |

**Figure 8. KM-Curve: VWA5B2 survival specific mutation gene**

**VWA5B2**

**A** Overall Survival Kaplan-Meier Estimate

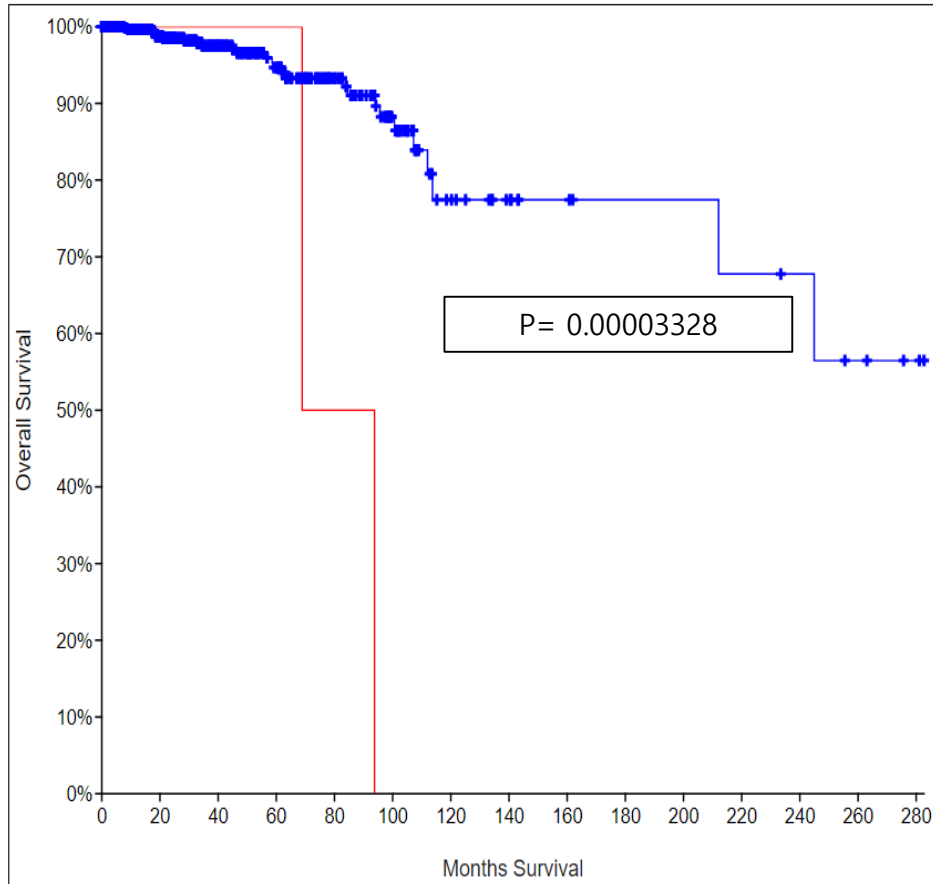

|                                              | Number of Cases, Total | Number of Cases, Deceased | Median Months Survival |
|----------------------------------------------|------------------------|---------------------------|------------------------|
| Cases with Alteration(s) in Query Gene(s)    | 3                      | 2                         | 68.89                  |
| Cases without Alteration(s) in Query Gene(s) | 649                    | 27                        | NA                     |

**B** Disease/Progression-free Kaplan-Meier Estimate

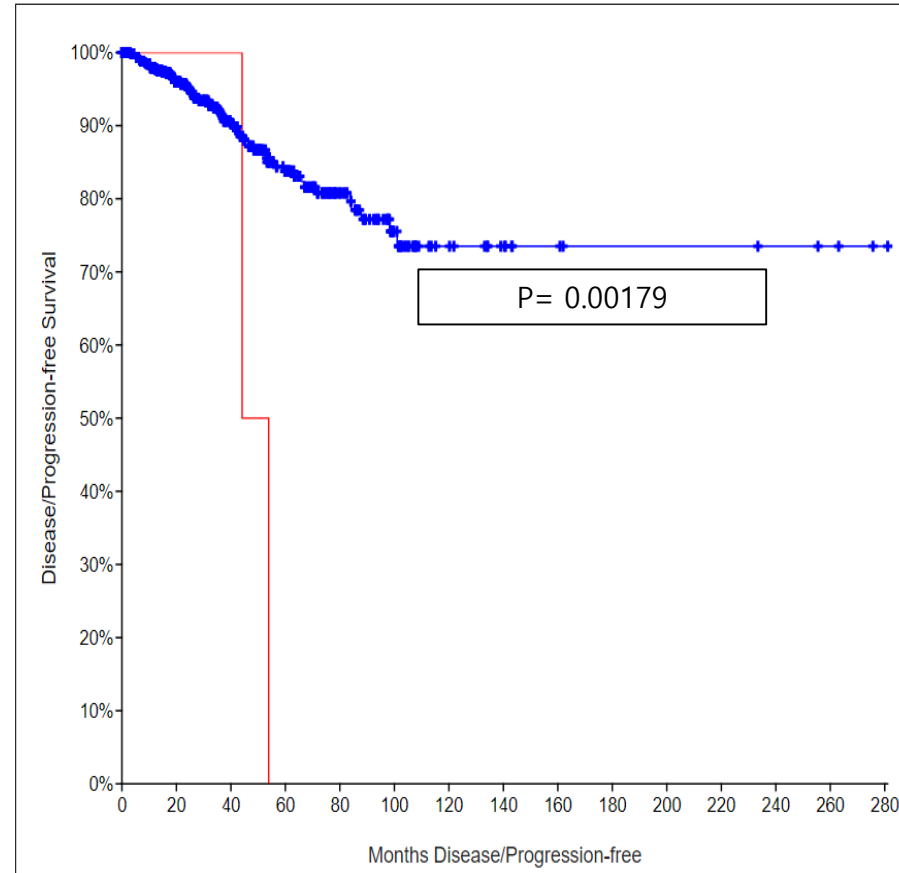

|                                              | Number of Cases, Total | Number of Cases, Relapsed/Progressed | Median Months Disease-free |
|----------------------------------------------|------------------------|--------------------------------------|----------------------------|
| Cases with Alteration(s) in Query Gene(s)    | 3                      | 2                                    | 44.12                      |
| Cases without Alteration(s) in Query Gene(s) | 649                    | 61                                   | NA                         |
